# Supplementary material
Source: Frontiers journal article supplement (https://www.frontiersin.org/articles/489305)
Supplement: Presentation_2.pdf [file Presentation_2.pdf]

## *Supplementary Material*

### **1 Supplementary methods**

#### **Cell Proliferation and Cytotoxicity Assay**

Cell proliferation and cytotoxicity was analyzed using the Cell Titer Glow luminescent cell viability assay (Sigma-Aldrich, St. Louis, USA). Cells were seeded overnight into 96-well plates at a density of  $5 \times 10^4$  cells/well and treated with different concentration of cisplatin for 24 h. Cell viability was analyzed by the luminescence levels using a microplate reader (Tecan, Männedorf, Switzerland) according to manufacturer's instructions.

#### **Sphere Forming Assay**

Cells were seeded at  $2 \times 10^3$  cells/well containing 1 ml sphere forming medium in a 24-well ultra-low attachment plate (Corning, New York, USA). Sphere forming medium consisted of mammary epithelial basal medium (Lonza, Basel, Switzerland) supplemented with 1 ml B27 (Invitrogen, Carlsbad, USA), 20 ng/ml EGF (Invitrogen, Carlsbad, USA), 20 ng/ml basic FGF (Peprotech, Rocky Hill, USA), 4  $\mu$ g/ml Insulin (Invitrogen, Carlsbad, USA) and 1% penicillin/streptomycin (Gibco, life technologies, Waltham, USA). Cells were incubated for 7 days before adding another 1 ml of medium and resuspending spheres using a 1 ml pipette tip. Following another 7 days of incubation, cells were resuspended and images were collected on a Celigo system (Nexcelom Bioscience, Lawrence, USA).

### **2 Supplementary Figures and Tables**

**Supplementary Table 1A.** Correlation of genes with NRP2 in the provisional BCa cohort of The Cancer Genome Atlas (TCGA)

**Supplementary Table 1B.** Correlation of genes with GLI2 in the provisional BCa cohort of The Cancer Genome Atlas (TCGA).

**Supplementary Table 2.** Complete list of p-values for all qPCR experiments as determined by two-way ANOVA.

**Supplementary Table 3.** Table of PCR primers.

**Supplementary Table 4.** Table of antibodies.

**Supplementary Figure 1.** Correlation of GLI2 and NRP2 gene expression in a provisional (A) breast cancer and (B) prostate cancer cohort of The Cancer Genome Atlas (TCGA). (C) mRNA expression levels of NRP2 and Gli2 in a panel of 15 bladder cancer cell lines. Normalized to housekeeping gene HPRT1. (D) Analysis of NRP2 and GLI2 co-expression in the cell lines of urinary tract (n=26) using RNA-sequencing (RNA-seq) data from Broad Institute Cell Line Encyclopedia (<https://portals.broadinstitute.org/ccle/page?gene=NRP2>; <https://portals.broadinstitute.org/ccle/page?gene=GLI2>).

**Supplementary Figure 2.** Kaplan Meier plot of disease-free survival (DFS) of bladder cancer (BCa)

patients with high (red) compared to low mRNA signature (green) for NRP2 (A), GLI2 (B) and combined NRP2/GLI2 (C). Log-Rank value was increased compared to single gene signature.

**Supplementary Figure 3.** Quantitative real-time PCR of total NRP2, NRP2a, NRP2b, GLI2 and GLI1 in cell line J82: siRNA-mediated knockdown of NRP2 or GLI2 (siNRP2 or siGLI2) or scrambled control (siSCR) and treated with 5 ng/ml TGFβ1 or left untreated (+/-). Normalized to housekeeping gene HPRT1 (A), GAPDH (B) or ACTB (C) and plotted relative to untreated siSCR sample. Significance calculated by two-way ANOVA and shown in supplementary table 2. Error bars indicate standard error of the mean. n=3.

**Supplementary Figure 4.** Quantitative real-time PCR of total NRP2, NRP2a, NRP2b, GLI2 and GLI1 in cell line HS853T: siRNA-mediated knockdown of NRP2 or GLI2 (siNRP2 or siGLI2) or scrambled control (siSCR) and treated with 5 ng/ml TGFβ1 or left untreated (+/-). Normalized to housekeeping gene HPRT1 (A), GAPDH (B) or ACTB (C) and plotted relative to untreated siSCR sample. Significance calculated by two-way ANOVA and shown in supplementary table 2. Error bars indicate standard error of the mean. n=3.

**Supplementary Figure 5.** (A) Western blot analysis of NRP2 expression in parental wildtype bladder cancer cell line RT112 and KO clone #2 which were treated with 5 ng/ml TGFβ1 or left untreated (+/-). (B) Vimentin expression induced by TGFβ1. Data of the PCR array. n=2.

**Supplementary Figure 6.** (A) SPP1 expression in human EMT PCR array relative to untreated WT samples. n=2. Error bars indicate fold change uncertainty =  $\sigma_{FC} = FC * \ln 2 * \sqrt{(\sigma_x^2 / n_x + \sigma_y^2 / n_y)}$ . Correlation plot for all detected genes on the panel comparing KO #1 to WT (B) or KO #2 to WT (C). Red arrow points to SPP1 which was consistently deregulated in both independent knockout clones. n=2. Normalized to housekeeping gene HPRT1.

**Supplementary Figure 7.** Quantitative real-time PCR of CDH1 (E-Cadherin) normalized to housekeeping gene HPRT1 and plotted relative to treated WT sample. Significance calculated by two-way ANOVA. No significance detected. Error bars indicate standard error of the mean. n=4.

**Supplementary Figure 8.** (A) Sphere Forming Assay in defined anchorage-independent conditions. Significance determined by two-tailed, unpaired student's T-test. Error bars indicate standard error of the mean. n=3. (B) qPCR of EMT regulators following NRP2 knockdown in cell line HS853T without TGFβ1 treatment. Gene expression was normalized to housekeeping genes HPRT1 and GAPDH. Significance calculated by paired t-test. Error bars indicate standard error of the mean. n=3. (C) Validated genes positively correlate with expression of both, NRP2 and GLI2 genes in a provisional bladder cancer cohort of The Cancer Genome Atlas (TCGA), n = 408. (D) Surviving fraction of cell line J82 after transfection with scrambled siRNA or SPP1 specific siRNA. Error bars indicate standard deviation. n=3. (E) SPP1 knockdown was validated by qPCR. Significance calculated by paired t-test. Error bars indicate standard error of the mean. n=3.

**Supplementary Figure 9.** Kaplan Meier plot of overall survival (OS, left) and disease-free survival (DFS, right) of bladder cancer (BCa) patients with high (red) compared to low mRNA signature (green) for SPP1 (Osteopontin).

**Supplementary Figure 10.** Kaplan Meier plot of overall survival (OS, left) and disease-free survival (DFS, right) of bladder cancer (BCa) patients with high (red) compared to low mRNA signature (green) for combined NRP2/SPP1 signature improved predictive value for disease-free but not overall survival compared to single NRP2 gene expression.

**Supplementary Figure 11.** Cell viability analysis after treatment with different doses of cisplatin. From this curve, IC50 doses were calculated and lower dose (corresponding to KO #2) was applied in colony formation assay. n=3.

**Supplementary Figure 12.** Plating efficacy (left) with corresponding values for significance (right). Significance determined by ordinary one-way ANOVA. Error bars indicate standard error of the mean. n=3.

**Supplementary Figure 13.** Summary of alpha-beta ratio of parental wildtype bladder cancer cell line RT112, NRP2 KO clone #1 and NRP2 KO clone #2 treated with cisplatin at concentrations of  $1.52 \times 10^{-6}$  M for 24 h or untreated. The alpha-beta ratio are defined from interpolation of linear-quadratic cell survival curves using mean values of three independent experiments.

**Supplementary Figure 14.** (A) Quantitative real-time PCR of NRP2 and GLI2 in cell line 5637 normalized to HPRT1. (B, C, D): qPCR of total NRP2, NRP2a, NRP2b, GLI2 and GLI1 in cell line 5637: siRNA-mediated knockdown of NRP2 or GLI2 (siNRP2 or siGLI2) or scrambled control (siSCR) and treated with 5 ng/ml TGF $\beta$ 1 or left untreated (+/-). Normalized to housekeeping gene HPRT1 (B), GAPDH (C) or ACTB (D) and plotted relative to untreated siSCR sample. Significance calculated by two-way ANOVA and shown in supplementary table 2. Error bars indicate standard error of the mean. n=3.
